# Supplementary material
Source: PubMed Central journal article supplement (PMC4119820)
Supplement: NIHMS594704-supplement-1.pdf [file NIHMS594704-supplement-1.pdf]

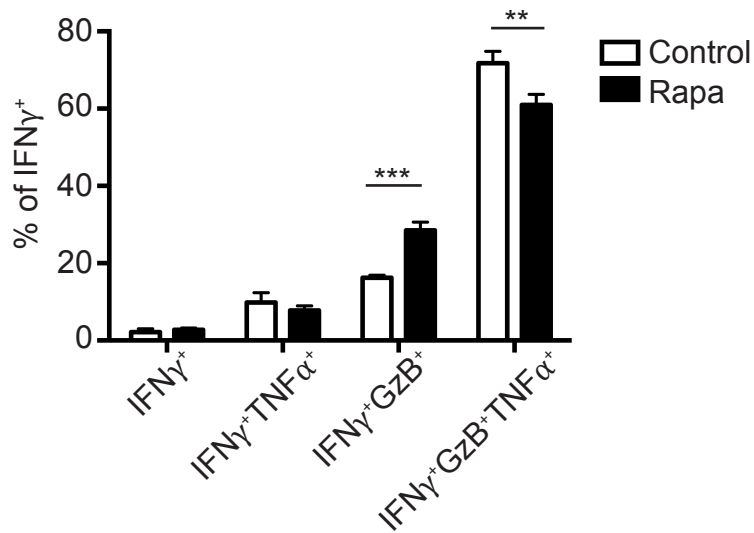

**Supplemental Figure 1. Proportions of polyfunctional populations.**

Percentages of IFN $\gamma$ -producing CD8 T cells that were making Granzyme B and/or TNF $\alpha$  are also shown. Representative of 2 independent repeats, each with n=8 mice/group. Statistical differences were calculated by unpaired two-tailed student's t-test. Control group is represented by open bars; rapa group is represented by filled bars.

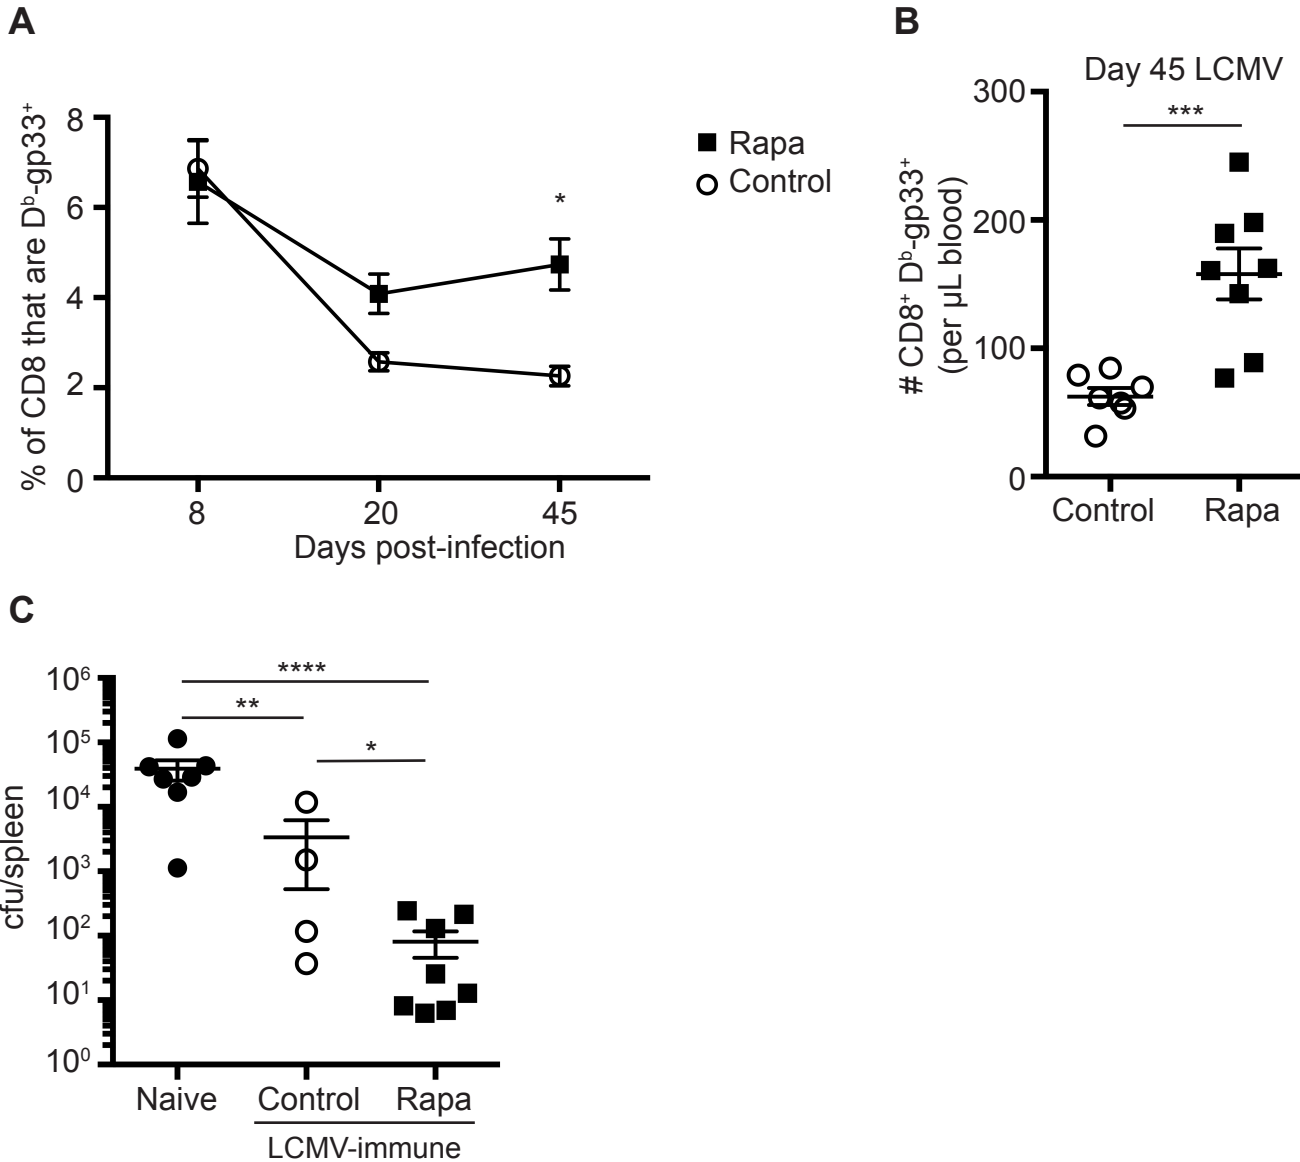

### Supplemental Figure 2. Low-dose rapamycin improves CD8 T cell memory after LCMV infection.

Mice were infected with LCMV during rapa treatment and allowed to progress to the CD8 T cell memory phase. (A) Kinetics of the percentage of CD8 T cells that are gp33 tetramer-positive in the blood after LCMV infection. (B) Absolute number of gp33 tetramer-positive cells in the blood 45 days after infection. (C) At least 45 days after infection mice were challenged with Lm-gp33. Day 3 post-challenge spleens were harvested and bacterial burdens were measured. (A) statistical differences were calculated by 2-way ANOVA. (B) Statistical differences were calculated by unpaired student's t-test. (C) Statistical differences were calculated by 1-way ANOVA of log-transformed data. (A-C) LCMV-infected mice treated with vehicle are represented by open circles, LCMV-infected mice treated with rapa during infection are represented by filled squares; uninfected mice are represented by filled circles. Representative of 2 independent experiments.
